# Supplementary material for: Genetic determination of piglet survival upon PRRSV outbreaks
Source: Research Square preprint supplement (doi:10.21203/rs.3.rs-4503083/v1), 2024-06-25
Supplement: Supplementary file 1 [file 0176b7f6364aa912c17c290b.docx]

**Additional file 1.** Comparison ofPRRSV ORF5 sequences.Similarity (%) between the field strain and reference strains.

| **PRRSV reference strains** | **Field strain isolated on the studied farm** |
| --- | --- |
| UNISTRAIN PRRS | 83.196 |
| Porcilis PRRS | 81.908 |
| ReproCyc PRRS | 82.237 |
| Suvaxyn PRRS | 82.102 |
| Lelystad strain | 82.072 |
| VR-2332 strain | 63.651 |
| Rosalia strain | 95.222 |
