# Supplementary material for: Genetic determination of piglet survival upon PRRSV outbreaks
Source: Research Square preprint supplement (doi:10.21203/rs.3.rs-4503083/v1), 2024-06-25
Supplement: Supplementary file 2 [file 10d5748b4c060785a5b18dec.docx]

**Additional file 2.** Mean values of immunity parameters measured at 9 weeks in the transition farm and carcass measurements for the litters arriving at slaughterhouse according to its sire genotype for each genetic marker.

| **SNP**  **genotype** | IgG levels | *SOX13* expression | Carcass weight (kg) | Carcass lean meat % | Backfat thickness 3-4 rib | Loin thickness 3-4 rib | Ham backfat thickness | Ham lean meat % | Loin lean meat % | Shoulder lean meat % |
| --- | --- | --- | --- | --- | --- | --- | --- | --- | --- | --- |
| rs340943904 |  |  |  |  |  |  |  |  |  |  |
| TT | 4.84a | 3.94 a | 113.23a | 35.10 a | 40.71 a | 42.28 a | 27.04 a | 51.28 a | 22.98 a | 48.12 a |
| GT | 4.29a | 6.68 b | 107.74b | 44.46 b | 29.55b | 46.26 b | 20.46 b | 60.30 b | 39.60 b | 56.30 b |
| GG | 4.69a | 6.98 b | 102.21c | 43.84 b | 29.66b | 44.60 b | 20.79 b | 59.42 b | 38.09 b | 55.49 b |
| rs1107556229 |  |  |  |  |  |  |  |  |  |  |
| AA | 5.03a | 6.82 a | 107.02a | 41.59 a | 32.16 a | 43.57 a | 22.50 a | 57.15 a | 34.36 a | 53.58 a |
| AG | 4.31b | 6.56 a | 102.92b | 43.86 b | 29.91b | 44.63 a | 20.63 b | 59.57 b | 38.08 b | 55.49 b |
| GG | 4.18b | 7.26 a | 97.35 c | 48.43 c | 25.77 c | 53.71 b | 18.63 c | 64.63 c | 46.87 c | 60.65 c |
| rs81464083 |  |  |  |  |  |  |  |  |  |  |
| TT | 4.71a | 7.13 a | 105.18a | 42.44 a | 31.47 a | 44.40 a | 21.63 a | 58.32 a | 36.05 a | 54.48 a |
| TC | 4.58a | 6.07 a | 102.93a | 43.98 a | 29.60 a | 44.83 a | 20.90 a | 59.39 a | 38.08 a | 55.54 a |
| rs319560097 |  |  |  |  |  |  |  |  |  |  |
| TT | 5.00a | 6.73 a | 102.23a | 44.04 a | 29.88 a | 44.45 a | 20.05 a | 60.32 a | 38.13 a | 56.48 a |
| CT | 4.69b | 5.96 a | 106.28a | 41.92 a | 32.19 a | 44.98 a | 22.43 a | 57.57 a | 34.95 a | 53.87 a |
| CC | 4.32b | 7.88 a | 101.69a | 45.06 a | 28.10 a | 44.45 a | 19.86 a | 60.46 a | 40.32 a | 56.25 a |
| rs338661853 |  |  |  |  |  |  |  |  |  |  |
| GG | 4.68a | 6.81 a | 103.59a | 44.01 a | 29.71 a | 44.82 a | 20.71 a | 59.59 a | 38.32 a | 55.66 a |
| AG | 4.42a | 6.34 a | 106.36a | 40.51 a | 33.52 a | 44.39 a | 23.14 a | 56.53 a | 32.95 a | 52.85 a |
| rs81391061 |  |  |  |  |  |  |  |  |  |  |
| CC | 4.73a | 6.72 a | 105.42a | 42.19 a | 31.72 a | 44.08 a | 21.92 a | 57.95 a | 35.34 a | 54.17 a |
| AC | 3.98a | 6.65 a | 96.66 b | 49.70 b | 23.33b | 48.73 b | 17.09 b | 64.89 b | 48.15 b | 60.36 b |
| rs81233340 |  |  |  |  |  |  |  |  |  |  |
| AA | 4.68a | 6.67 a | 104.67a | 42.88 a | 30.87 a | 44.21 a | 21.41 a | 58.58 a | 36.51 a | 54.70 a |
| AC | 4.07a | 7.06 a | 99.09 a | 47.08 b | 27.13 a | 50.46 b | 19.51 a | 62.61 b | 43.82 b | 58.75 b |
| rs80904079 |  |  |  |  |  |  |  |  |  |  |
| AA | 4.73a | 6.89 a | 107.81a | 40.51 a | 34.12 a | 44.36 a | 23.25 a | 56.45 a | 32.35 a | 52.90 a |
| AG | 4.09a | 6.29 a | 101.77b | 45.35 b | 28.64b | 46.68 a | 20.75 b | 60.26 b | 40.27 b | 56.43 b |
| GG | 4.5a | 6.85 a | 104.40ab | 44.72 ab | 29.10b | 45.41 a | 19.98 b | 60.55 b | 39.58 b | 56.53 b |
| rs342772739 |  |  |  |  |  |  |  |  |  |  |
| GG | 4.54a | 6.49 a | 105.50 a | 42.81 a | 31.02 a | 44.20 a | 21.56 a | 58.36 a | 36.33 a | 54.55 a |
| AA | 5.16a | 8.05 b | 97.72 b | 45.33 a | 28.23 a | 47.38 a | 19.69 a | 61.65 a | 41.09 b | 57.45 a |
| rs80803525 |  |  |  |  |  |  |  |  |  |  |
| AA | 4.63a | 6.18 a | 104.66 a | 42.01 a | 31.74 a | 43.61 a | 22.04 a | 57.65 a | 34.95 a | 53.85 a |
| AG | 4.71a | 7.03 a | 103.79 a | 44.37 a | 29.54 a | 45.88 a | 20.54ab | 60.06ab | 39.22ab | 56.30 a |
| GG | 3.66a | 9.49 b | 103.00 a | 46.33 a | 26.95 a | 46.63 a | 19.03 b | 62.24 b | 42.01 b | 56.78 a |
| rs323856019 |  |  |  |  |  |  |  |  |  |  |
| CC | 4.69a | 6.87 a | 104.79 a | 42.51 a | 31.17 a | 44.02 a | 21.48 a | 58.42 a | 36.10 a | 54.52 a |
| TC | 4.53a | 6.48 a | 103.38 a | 44.25 a | 29.70 a | 45.71 a | 20.92 a | 59.61 a | 38.56 a | 55.75 a |

a,b,c Estimates with different letter superscripts within a SNP row are significantly different at a nominal P<0.05
