# Supplementary material for: Genetic determination of piglet survival upon PRRSV outbreaks
Source: Research Square preprint supplement (doi:10.21203/rs.3.rs-4503083/v1), 2024-06-25
Supplement: Supplementary file 3 [file 5fa7374c55f4ab639ef99c1f.docx]

**Additional file 3.** Boxplots showing the distribution of immunity phenotypes according to associated genetic markers. (A) Leukocytes counts; (B) IgG levels; (C) MCV; (D) MCH; (E) Lymphocytes counts; (F) CRP; (G) Lymphocytes phagocytosis capacity, (H) δγ-T cells.

**
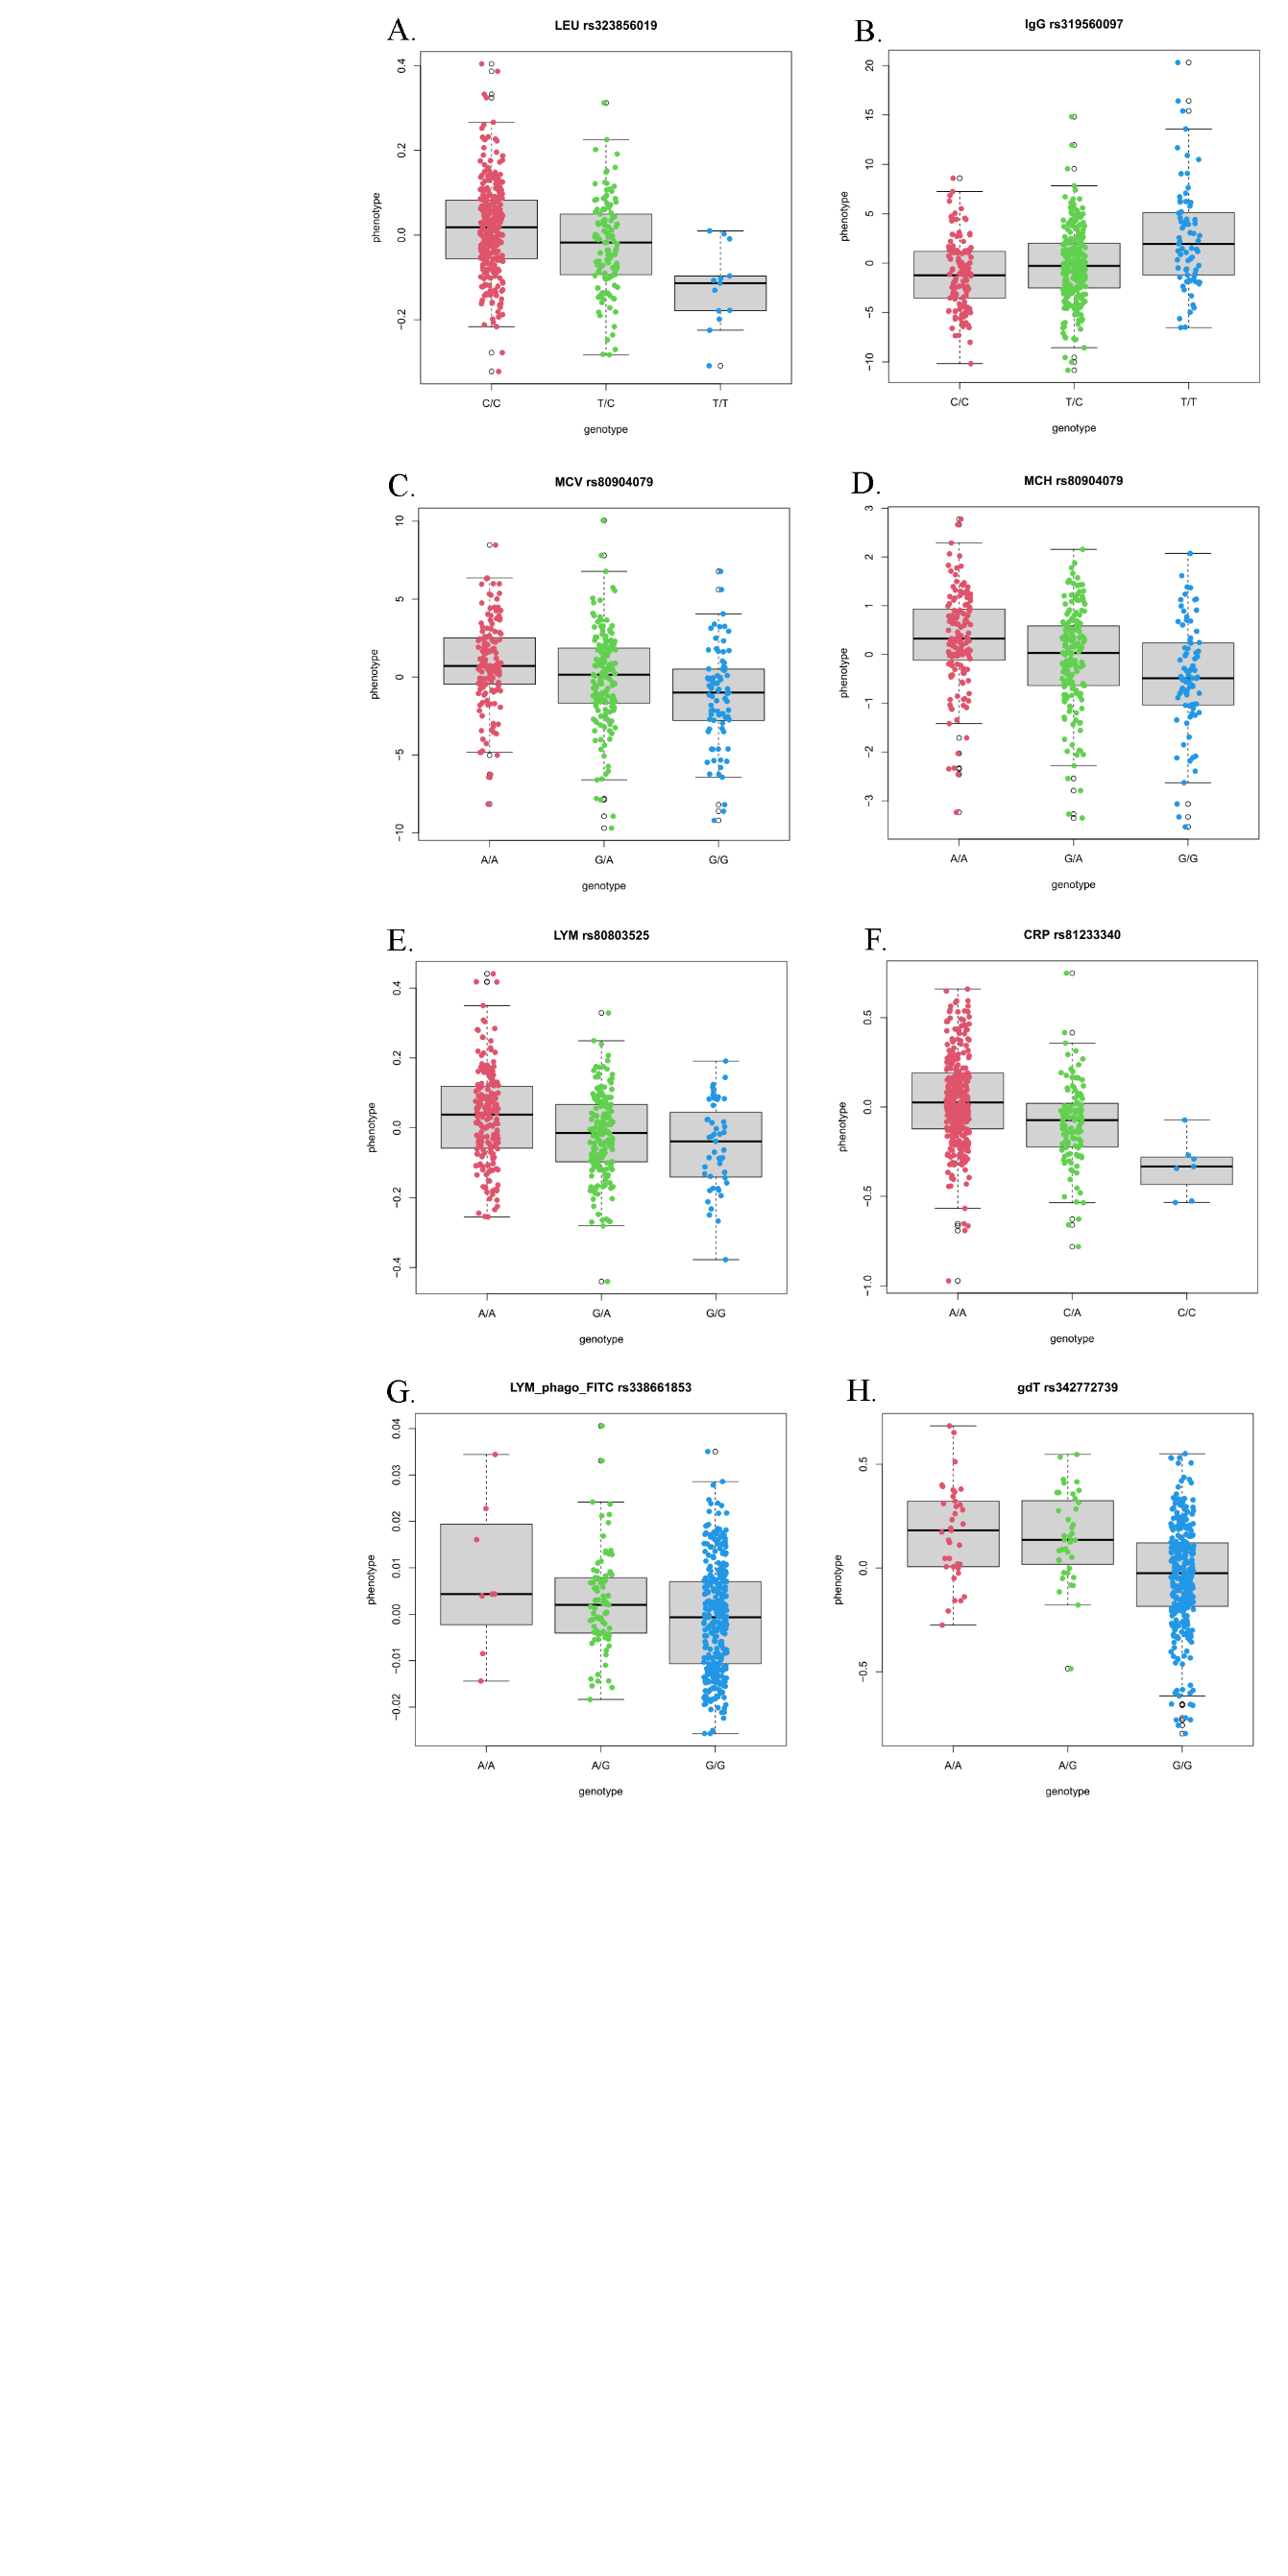
**
